# Supplementary material
Source: PubMed Central journal article supplement (PMC5222743)

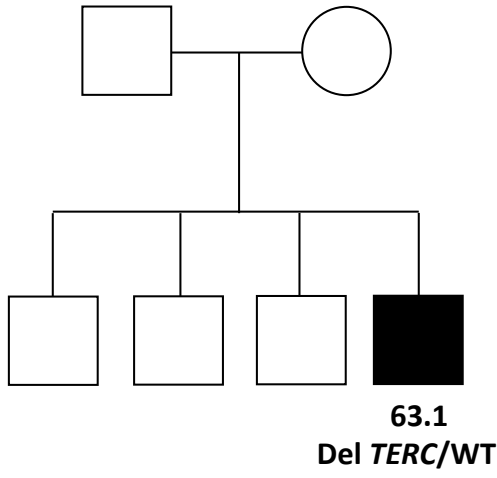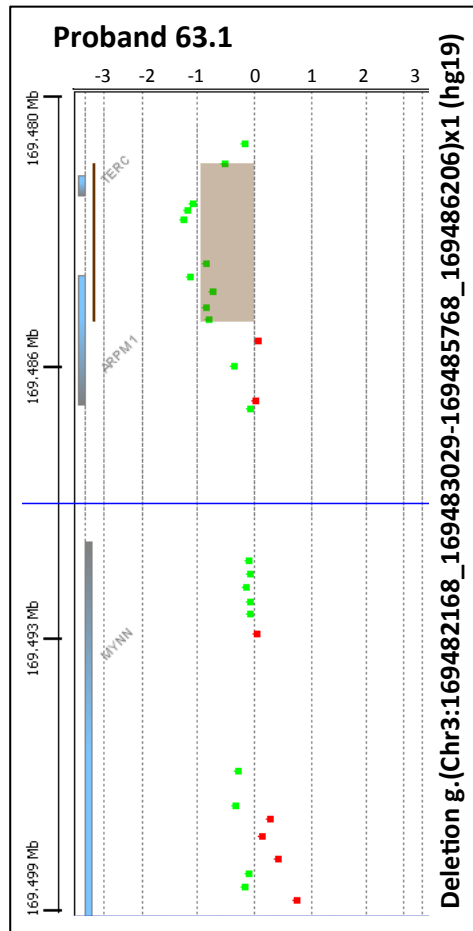

IGV screenshot

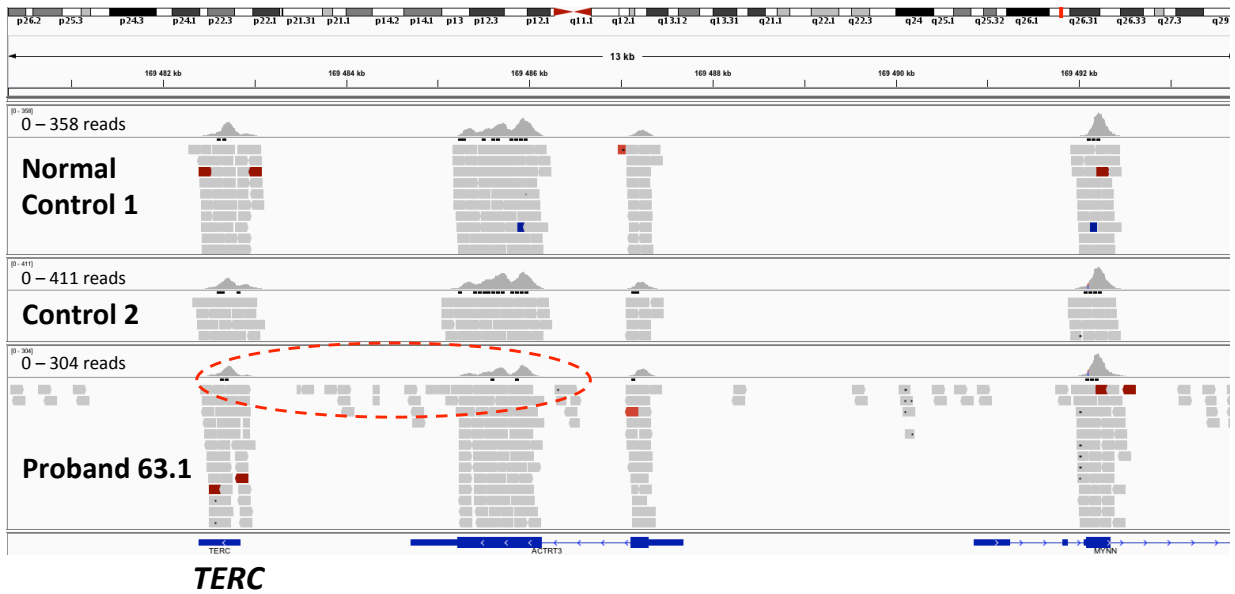

Figure E2.

Supplement: NIHMS814036-supplement-2.pdf [file NIHMS814036-supplement-2.pdf]
